# Supplementary material for: Process Evaluation of an Early-Intervention Program for Mood and Anxiety Disorders Among Older Adolescents and Young Adults
Source: Atypon-hosted journal article supplement (doi:10.1176/appi.ps.201400256), 2015-06-02
Supplement: appi.ps.201400256.ds001.pdf [file appi.ps.201400256.ds001.pdf]

## **Supplementary Figure Legends**

**Supplementary Figure 1:** Causal model for pathways to care represented by the early identification and intervention program known as the First Episode Mood and Anxiety Program (FEMAP) in London, Ontario, Canada. Phase I includes the following steps as indicated; results of the evaluation of steps 2 through 4 are presented. Step 1 was previously published (see text). Phase II is the subject of a separate investigation.

1. Community outreach to educate about FEMAP where youth make contact, including secondary and post-secondary schools, community mental health agencies, primary care, etc.
2. Youth either self-refer or are referred by a physician to FEMAP, which is located in a youth-friendly facility (renovated house) in the community. Short (5-question) telephone screening directly with the youth is conducted by FEMAP reception to verify inclusion/exclusion criteria.
3. Youth are carefully assessed in person by a clinical professional (e.g., masters in clinical social work) to evaluate mental health concerns, addiction issues, functional impairment, psychosocial environment, and other relevant variables. A case conference ensues to decide best treatment.
4. Youth are either accepted to FEMAP, referred to more appropriate service, or reassured if no specialized treatment is indicated. Referral to alternative programs, if indicated, is facilitated. Only after acceptance are physician (psychiatrist) resources utilized, as in Phase II.

**Supplementary Figure 2:** Logic model of FEMAP illustrating the outputs and outcomes of the model, including activities and participation as well as short, medium and long-term goals. A

concerning potential unintended consequence to the model is listed. Phase I activities and participation, as well as short and medium term outcomes, were evaluated in this study.

# Figure S1: Causal Model of FEMAP

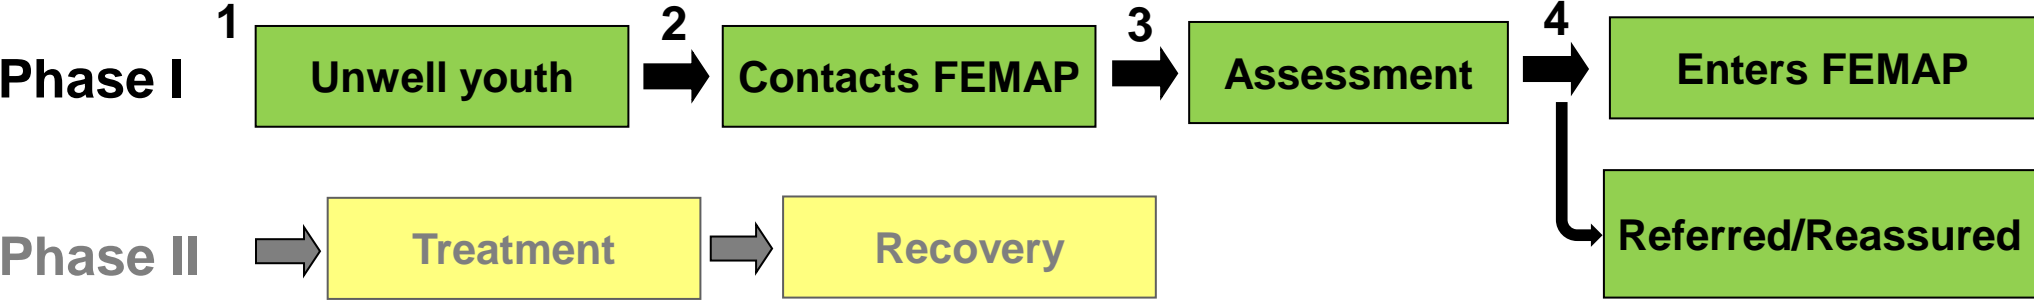

**Figure S2: Logic Model of FEMAP**

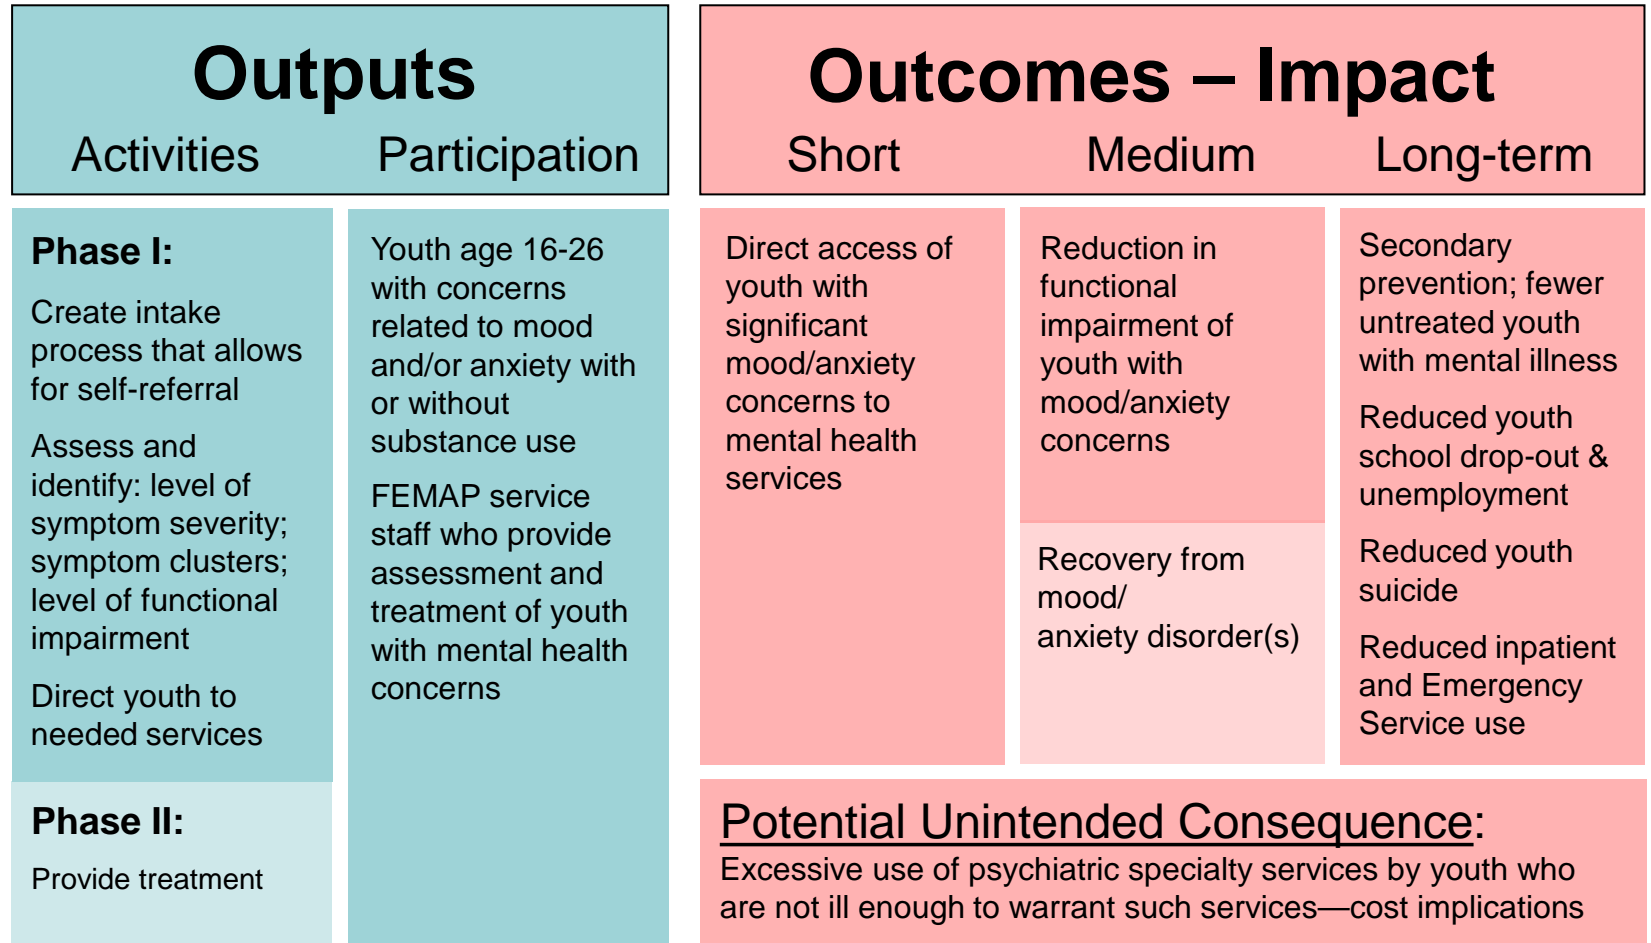

**Supplementary Table 1: Referral sources of 548 youth who sought help from the First Episode Mood and Anxiety Program (FEMAP), data missing from 2 youth**

| <b>Youth referred by –</b>                      | <b>Count</b> | <b>Percent</b> |
|-------------------------------------------------|--------------|----------------|
| <b>Physician</b>                                |              |                |
| Family Doctor                                   | 97           | 18             |
| Acute care hospital's urgent psychiatric clinic | 50           | 9.1            |
| Inpatient unit                                  | 31           | 5.7            |
| Children's or Adult emergency department        | 7            | 1.3            |
| Hospital's mental health coordinated intake     | 12           | 2.2            |
| Early intervention psychosis program            | 1            | .2             |
| Regional mental health care hospital program    | 8            | 1.5            |
| Other psychiatrist                              | 8            | 1.5            |
| <b>Non-physician</b>                            |              |                |
| Self-sought, family member, friend              | 148          | 27             |
| Canadian Mental Health Association              | 11           | 2              |
| Student counseling services, post-secondary     | 92           | 16.8           |
| High school guidance                            | 48           | 8.8            |
| Children's Aid Society                          | 3            | .5             |
| Private therapist/counselor                     | 8            | 1.5            |
| Community crisis service                        | 7            | 1.3            |
| Community mental health agency other than above | 11           | 2              |

Newspaper article or public talk heard by self/family/friend 4 .7

**Supplementary Table 2: Demographic and clinical characteristics of 548 youth who sought help from FEMAP, divided into those accepted into FEMAP and those referred or reassured only**

| Characteristics <sup>a</sup>     | Accepted (N = 399) |       | Referred/Reassured (N = 149) |      |
|----------------------------------|--------------------|-------|------------------------------|------|
| <b>Age (years)</b>               |                    |       |                              |      |
| Mean ± Standard Deviation        | 19.2               | ± 2.7 | 19.2                         | ±2.6 |
| Range                            | 16 - 26            |       | 16 - 26                      |      |
| <b>Sex (N and %)</b>             |                    |       |                              |      |
| Female                           | 243                | 61%   | 98                           | 66%  |
| Male                             | 156                | 39%   | 51                           | 34%  |
| <b>Ethnicity (N and %)</b>       |                    |       |                              |      |
| White, not Hispanic              | 339                | 85%   | 132                          | 89%  |
| Black, not Hispanic              | 4                  | 1%    | 0                            | 0%   |
| Hispanic                         | 3                  | 1%    | 0                            | 0%   |
| Asian/Pacific Islander           | 19                 | 5%    | 6                            | 4%   |
| Native                           | 5                  | 1.3%  | 2                            | 1.3% |
| Other or missing                 | 29                 | 7.3%  | 9                            | 6%   |
| <b>Referral source (N and %)</b> |                    |       |                              |      |
| Physician                        | 156                | 39%   | 58                           | 39%  |
| Non-physician                    | 241                | 60%   | 91                           | 61%  |

|                                             |     |      |    |     |
|---------------------------------------------|-----|------|----|-----|
| Missing                                     | 2   | 0.5% | 0  | 0%  |
| Any past treatment (N and %)                |     |      |    |     |
| Yes, any                                    | 253 | 63%  | 89 | 60% |
| Yes, medication                             | 206 | 52%  | 77 | 52% |
| No                                          | 142 | 36%  | 56 | 38% |
| Substance involvement risk (N and %)        |     |      |    |     |
| Low                                         | 184 | 46%  | 69 | 46% |
| Moderate                                    | 132 | 33%  | 52 | 35% |
| High                                        | 75  | 19%  | 21 | 14% |
| Completed follow-up questionnaire (N and %) |     |      |    |     |
| Yes                                         | 213 | 53%  | 69 | 46% |
| No                                          | 186 | 47%  | 80 | 54% |

<sup>a</sup>No variables differed significantly between groups by Chi-square at  $p < 0.05$ .

**Supplementary Table 3: Frequency of presumptive diagnoses of 547 youth contacting FEMAP grouped into subgroups of accepted and referred/reassured youth<sup>a</sup>.**

| Diagnostic category                              | Accepted (N = 396) |     | Referred/<br>reassured (N = 149) |       |
|--------------------------------------------------|--------------------|-----|----------------------------------|-------|
|                                                  | N                  | %   | N                                | %     |
| Depression & anxiety                             | 133                | 34% | 22                               | 15.5% |
| Depression                                       | 120                | 30% | 12                               | 8.5%  |
| Anxiety                                          | 62                 | 16% | 27                               | 19%   |
| Bipolar disorder                                 | 38                 | 10% | 4                                | 3%    |
| Substance use D/O                                | 15                 | 4%  | 6                                | 4%    |
| Axis IV <sup>b</sup>                             | 13                 | 3%  | 33                               | 23%   |
| Trauma/PTSD                                      | 12                 | 3%  | 18                               | 13%   |
| Miscellaneous (Axes II & III, ADHD, conduct D/O) | 3                  | 1%  | 20                               | 14%   |

<sup>a</sup>Diagnostic category differed between subgroups. Accepted youth were more likely to fall into the first 4 categories listed while referred/reassured youth were more likely to fall into the final 3 categories [Chi-square (7, n=538) =149,  $p < 0.0005$ ,  $\phi = 0.53$ ].

<sup>b</sup>Axis IV refers to youth for whom the clinical research team believed that life stressors were the primary cause of the symptoms, without which the youth would not have come for treatment.
